# Supplementary material for: Simultaneous Analysis of Free/Combined Phytosterols in Rapeseed and Their Dynamic Changes during Microwave Pretreatment and Oil Processing
Source: MDPI journal article supplement (doi:10.3390/foods11203219), 2022-10-14
Supplement: s1 [file s1]

## Supporting Information

### Tables S1–S5

**Table S1.** Optimization of the liquid-liquid extraction method/mg/kg.

| Extraction method | Combined brassicasterol | Combined campesterol | Combined $\beta$ -sitosterol | Free brassicasterol | Free campesterol  | Free $\beta$ -sitosterol | Total combined phytosterols | Total free phytosterols | Total phytosterols |
|-------------------|-------------------------|----------------------|------------------------------|---------------------|-------------------|--------------------------|-----------------------------|-------------------------|--------------------|
| Folch             | 171.23 $\pm$ 2.79       | 633.73 $\pm$ 4.04    | 864.33 $\pm$ 4.05            | 339.56 $\pm$ 0.67   | 458.43 $\pm$ 1.08 | 722.92 $\pm$ 1.50        | 1669.30                     | 1520.91                 | 3190.21            |
| Bligh-Dyer        | 158.02 $\pm$ 1.78       | 586.87 $\pm$ 0.93    | 798.43 $\pm$ 1.35            | 335.27 $\pm$ 0.95   | 454.93 $\pm$ 0.56 | 711.74 $\pm$ 0.31        | 1543.32                     | 1501.93                 | 3045.26            |
| MTBE              | 135.54 $\pm$ 3.97       | 519.27 $\pm$ 4.17    | 699.81 $\pm$ 4.76            | 297.29 $\pm$ 3.39   | 405.64 $\pm$ 4.25 | 635.31 $\pm$ 4.29        | 1354.61                     | 1338.23                 | 2692.84            |

**Table S2.** Effects of microwave pretreatment on the composition and content of phytosterols in rapeseed/mg/kg.

| Rapeseed      | Microwave pretreatment         | Combined brassicasterol | Combined campesterol | Combined $\beta$ -sitosterol | Free brassicasterol | Free campesterol  | Free $\beta$ -sitosterol | Total combined phytosterols | Total free phytosterols | Total phytosterols |
|---------------|--------------------------------|-------------------------|----------------------|------------------------------|---------------------|-------------------|--------------------------|-----------------------------|-------------------------|--------------------|
| Zhongyouza 19 | without microwave pretreatment | 153.96 $\pm$ 7.09       | 562.31 $\pm$ 7.48    | 920.77 $\pm$ 8.89            | 319.30 $\pm$ 1.02   | 421.45 $\pm$ 4.02 | 742.92 $\pm$ 3.49        | 1637.05                     | 1483.67                 | 3120.71            |
|               | with microwave pretreatment    | 158.37 $\pm$ 1.10       | 585.20 $\pm$ 3.34    | 941.75 $\pm$ 4.64            | 316.56 $\pm$ 1.59   | 451.82 $\pm$ 1.73 | 776.54 $\pm$ 1.72        | 1685.31                     | 1544.92                 | 3230.23            |
| Dadi 199      | without microwave pretreatment | 145.32 $\pm$ 2.31       | 582.49 $\pm$ 1.20    | 833.51 $\pm$ 2.14            | 342.82 $\pm$ 2.53   | 514.63 $\pm$ 2.93 | 799.82 $\pm$ 2.08        | 1561.33                     | 1657.27                 | 3218.61            |
|               | with microwave pretreatment    | 144.46 $\pm$ 6.17       | 573.05 $\pm$ 3.69    | 812.84 $\pm$ 4.97            | 360.08 $\pm$ 2.39   | 546.83 $\pm$ 2.28 | 835.59 $\pm$ 2.77        | 1530.35                     | 1742.49                 | 3272.84            |

**Table S3.** Effects of microwave pretreatment on the composition and content of phytosterols in rapeseed oil/mg/kg.

| Rapeseed      | Microwave pretreatment | Combined brassicasterol | Combined campesterol | Combined $\beta$ -sitosterol | Free brassicasterol | Free campesterol  | Free $\beta$ -sitosterol | Total combined phytosterols | Total free phytosterols | Total phytosterols |
|---------------|------------------------|-------------------------|----------------------|------------------------------|---------------------|-------------------|--------------------------|-----------------------------|-------------------------|--------------------|
| Zhongyouza 19 | without                |                         |                      |                              |                     |                   |                          |                             |                         |                    |
|               | microwave pretreatment | 267.58 $\pm$ 3.23       | 1113.97 $\pm$ 2.64   | 1704.62 $\pm$ 1.86           | 566.16 $\pm$ 1.31   | 796.67 $\pm$ 1.28 | 1320.69 $\pm$ 1.24       | 3086.17                     | 2683.52                 | 5769.68            |
|               | with                   |                         |                      |                              |                     |                   |                          |                             |                         |                    |
|               | microwave pretreatment | 294.69 $\pm$ 0.82       | 1197.32 $\pm$ 0.92   | 1842.13 $\pm$ 0.75           | 618.59 $\pm$ 1.78   | 872.41 $\pm$ 1.90 | 1441.42 $\pm$ 1.96       | 3334.14                     | 2932.42                 | 6266.56            |
| Dadi 199      | without                |                         |                      |                              |                     |                   |                          |                             |                         |                    |
|               | microwave pretreatment | 238.28 $\pm$ 4.18       | 1083.27 $\pm$ 2.11   | 1469.52 $\pm$ 2.30           | 599.11 $\pm$ 0.44   | 918.21 $\pm$ 0.69 | 1345.54 $\pm$ 1.04       | 2791.07                     | 2862.86                 | 5653.93            |
|               | with                   |                         |                      |                              |                     |                   |                          |                             |                         |                    |
|               | microwave pretreatment | 240.73 $\pm$ 3.93       | 1095.79 $\pm$ 0.88   | 1466.96 $\pm$ 1.20           | 620.02 $\pm$ 1.30   | 951.47 $\pm$ 1.49 | 1384.87 $\pm$ 1.63       | 2803.48                     | 2956.36                 | 5759.83            |

**Table S4.** Effects of microwave pretreatment on the composition and content of phytosterols in rapeseed cake/mg/kg.

| Rapeseed      | Microwave pretreatment         | Combined brassicasterol | Combined campesterol | Combined $\beta$ -sitosterol | Free brassicasterol | Free campesterol | Free $\beta$ -sitosterol | Total combined phytosterols | Total free phytosterols | Total phytosterols |
|---------------|--------------------------------|-------------------------|----------------------|------------------------------|---------------------|------------------|--------------------------|-----------------------------|-------------------------|--------------------|
| Zhongyouza 19 | without microwave pretreatment | 82.36±1.90              | 211.97±2.40          | 378.31±2.41                  | 141.74±0.35         | 204.98±0.32      | 386.34±0.50              | 672.64                      | 733.06                  | 1405.69            |
|               | with microwave pretreatment    | 83.55±1.85              | 215.70±1.19          | 388.94±1.11                  | 134.27±0.64         | 193.58±0.22      | 377.01±0.36              | 688.19                      | 704.86                  | 1393.05            |
| Dadi 199      | without microwave pretreatment | 87.80±3.49              | 307.20±0.96          | 452.07±1.34                  | 177.99±1.42         | 264.97±1.17      | 432.67±0.26              | 847.07                      | 875.63                  | 1722.70            |
|               | with microwave pretreatment    | 95.94±2.00              | 341.26±2.07          | 516.82±2.67                  | 178.67±0.77         | 266.50±0.58      | 455.94±0.57              | 954.02                      | 901.10                  | 1855.13            |

**Table S5.** Effect of microwave pretreatment on oil content in rapeseed, residual oil content in rapeseed cake and oil yield in rapeseed oil processing.

| Rapeseed      | Microwave pretreatment         | Oil content in rapeseed | Residual oil content in rapeseed cake | Oil yield of rapeseed |
|---------------|--------------------------------|-------------------------|---------------------------------------|-----------------------|
| Zhongyouza 19 | without microwave pretreatment | 40.80%                  | 13.46%                                | 31.59%                |
|               | with microwave pretreatment    | 42.11%                  | 13.00%                                | 33.45%                |
| Dadi 199      | without microwave pretreatment | 42.56%                  | 20.33%                                | 27.90%                |
|               | with microwave pretreatment    | 44.85%                  | 20.53%                                | 30.60%                |
